# Supplementary material for: Targeting the VEGFR2 signaling pathway for angiogenesis and fibrosis regulation in neovascular age-related macular degeneration
Source: PubMed Central journal article supplement — Sci Rep. 2024 Oct 27;14:25682. doi: 10.1038/s41598-024-76258-4 (PMC11514265; doi:10.1038/s41598-024-76258-4), 2024-10-27
Supplement: 41598_2024_76258_MOESM3_ESM.pdf [file 41598_2024_76258_MOESM3_ESM.pdf]

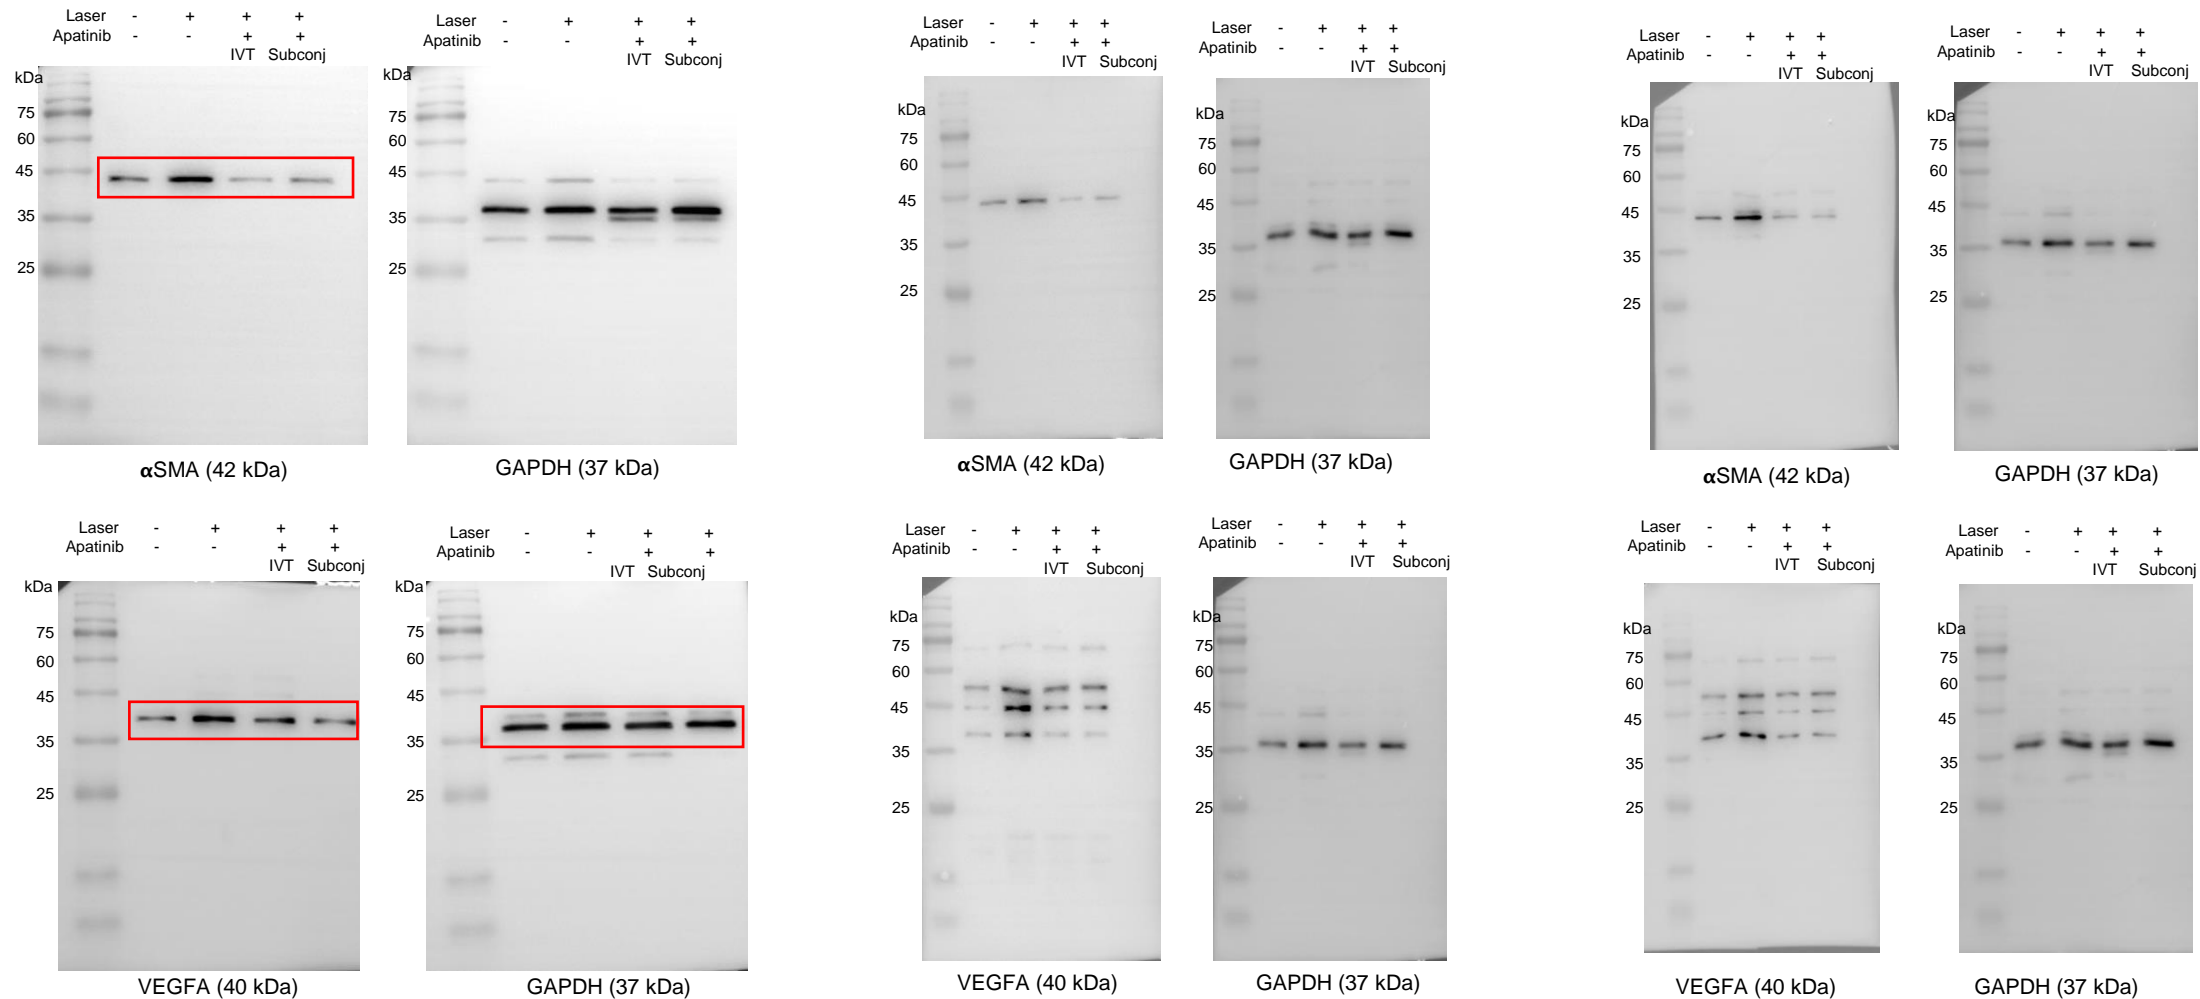

**Original images of western blots before cropping.** Expression levels of  $\alpha$ SMA and VEGFA were assayed with western blot, respectively. GAPDH was used as loading internal control. The raw blot images of full length membranes and the red frames were the image present of Fig. 5. All gels are 12%.

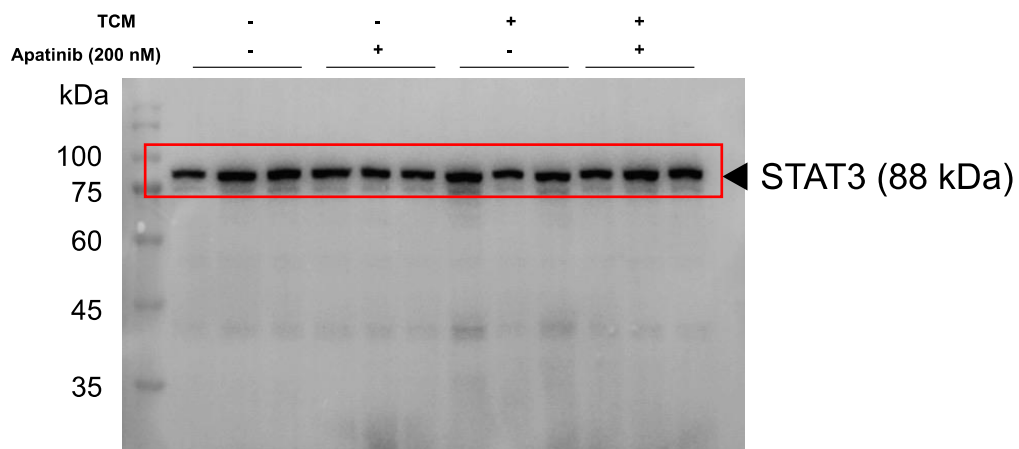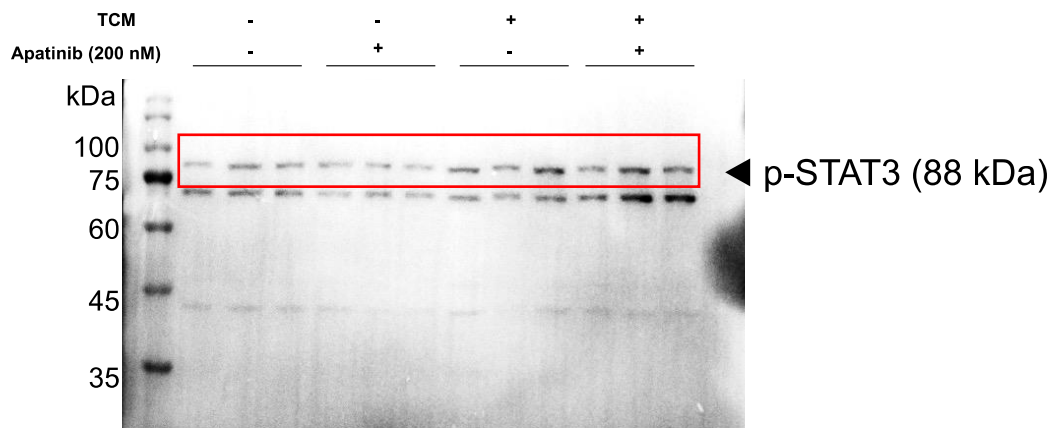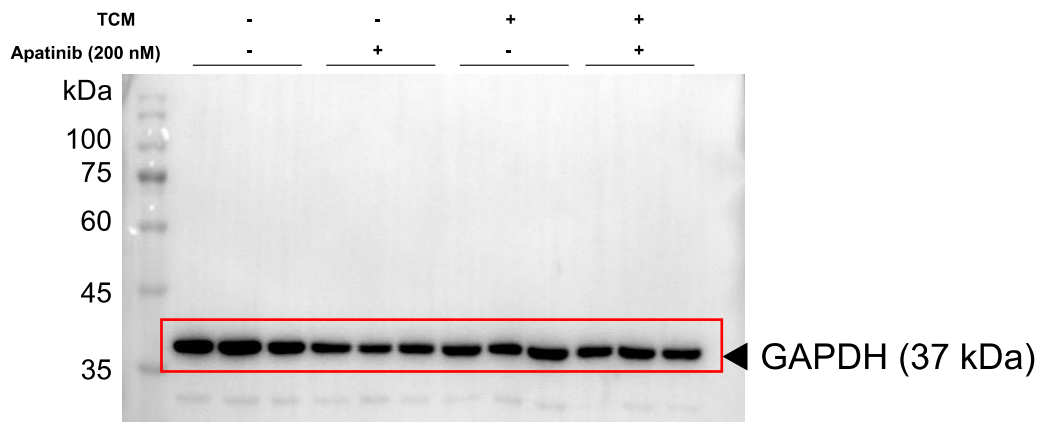

**Original images of western blots before cropping.** Expression levels of STAT3 and p-STAT3 were assayed with western blot, respectively. GAPDH was used as loading internal control. The raw blots images of full length membranes and the red frames were the image present of Fig. 8. All gels are 10%.
